# Supplementary material for: Teflon promotes chromosomal recruitment of homolog conjunction proteins during Drosophila male meiosis
Source: PubMed Central journal article supplement (PMC9612826; doi:10.1371/journal.pgen.1010469), 2022-10-17

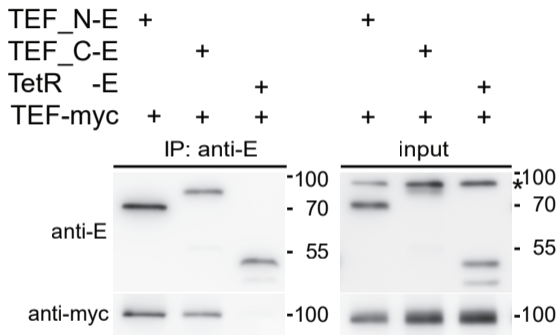

Supplement: pgen.1010469.s005.pdf [file pgen.1010469.s005.pdf]
